# Supplementary material
Source: bioRxiv or medRxiv preprint supplement (https://medrxiv.org/highwire/filestream/86759/field_highwire_adjunct_files/0/2020.06.18.20131326-1.pdf)
Supplement: Supplementary file [file 2020.06.18.20131326-1.pdf]

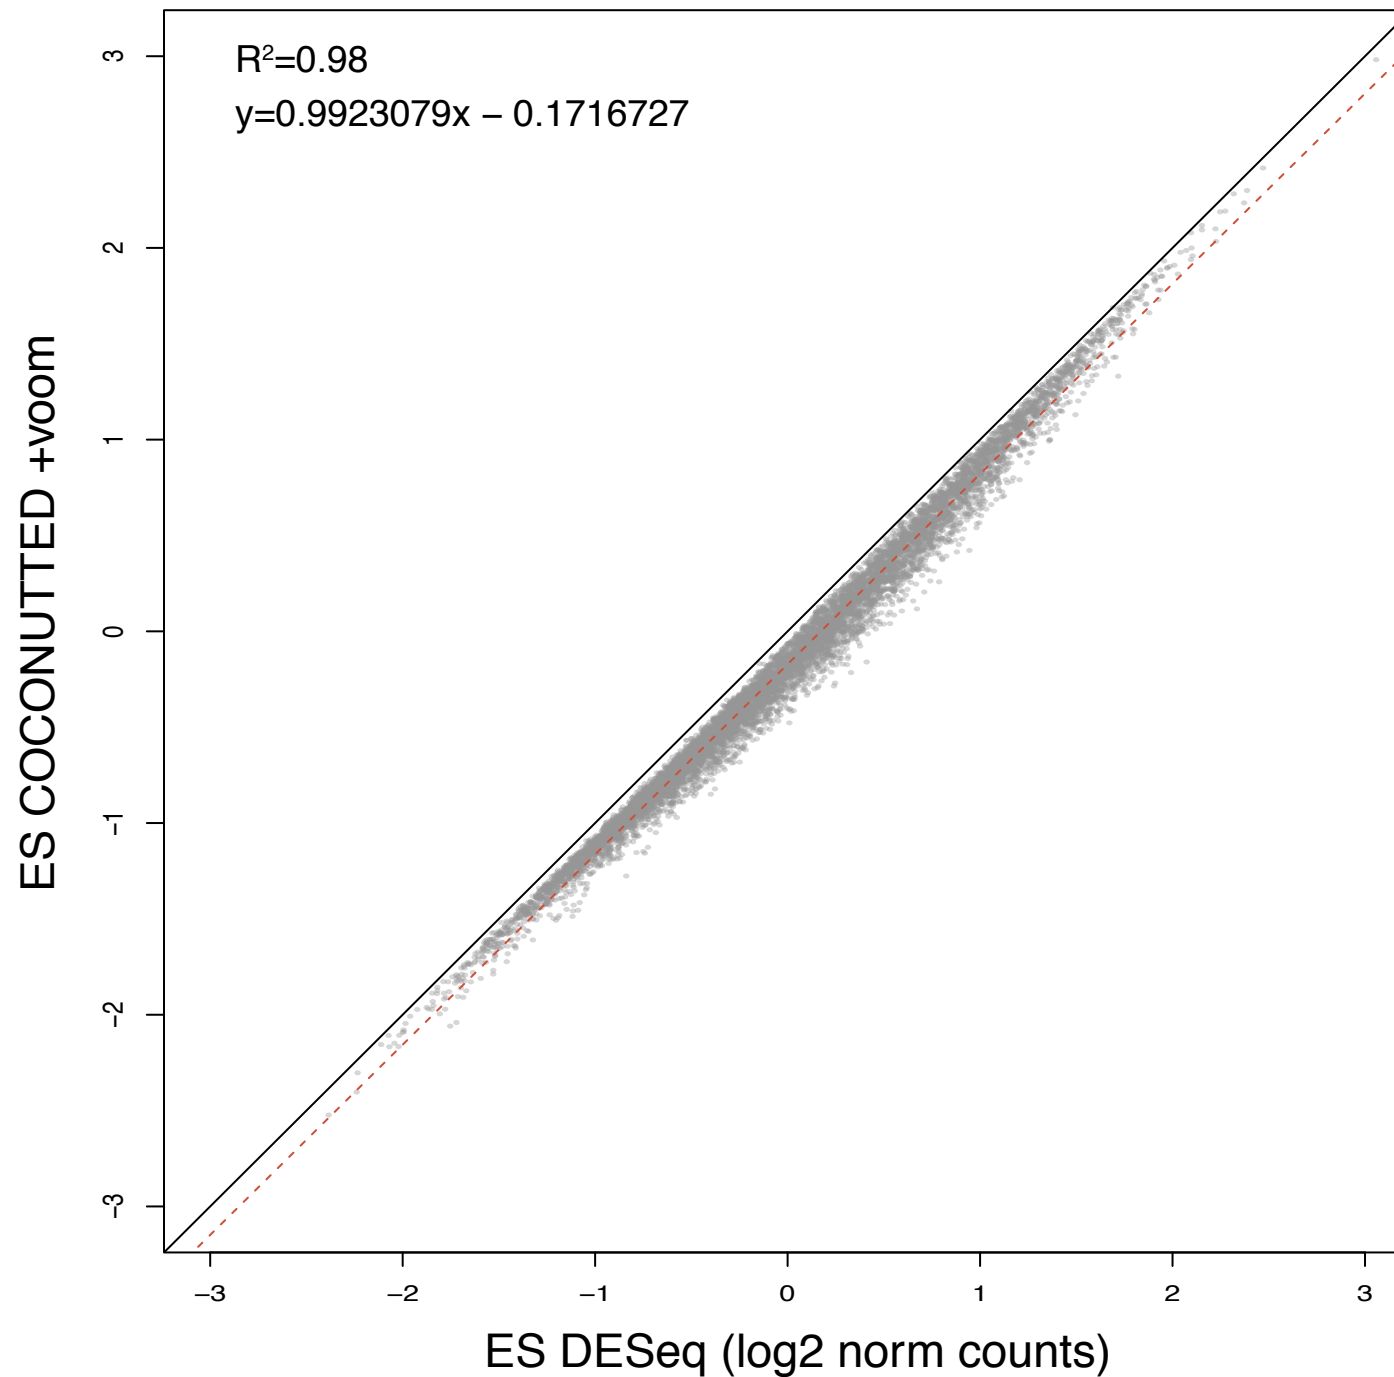

**Supplementary Figure 1.** Effect size of DESeq and post COCONUT -voom transformed data correlate.

# Power Analysis: Non-COVID Viral (652) vs Healthy (672)

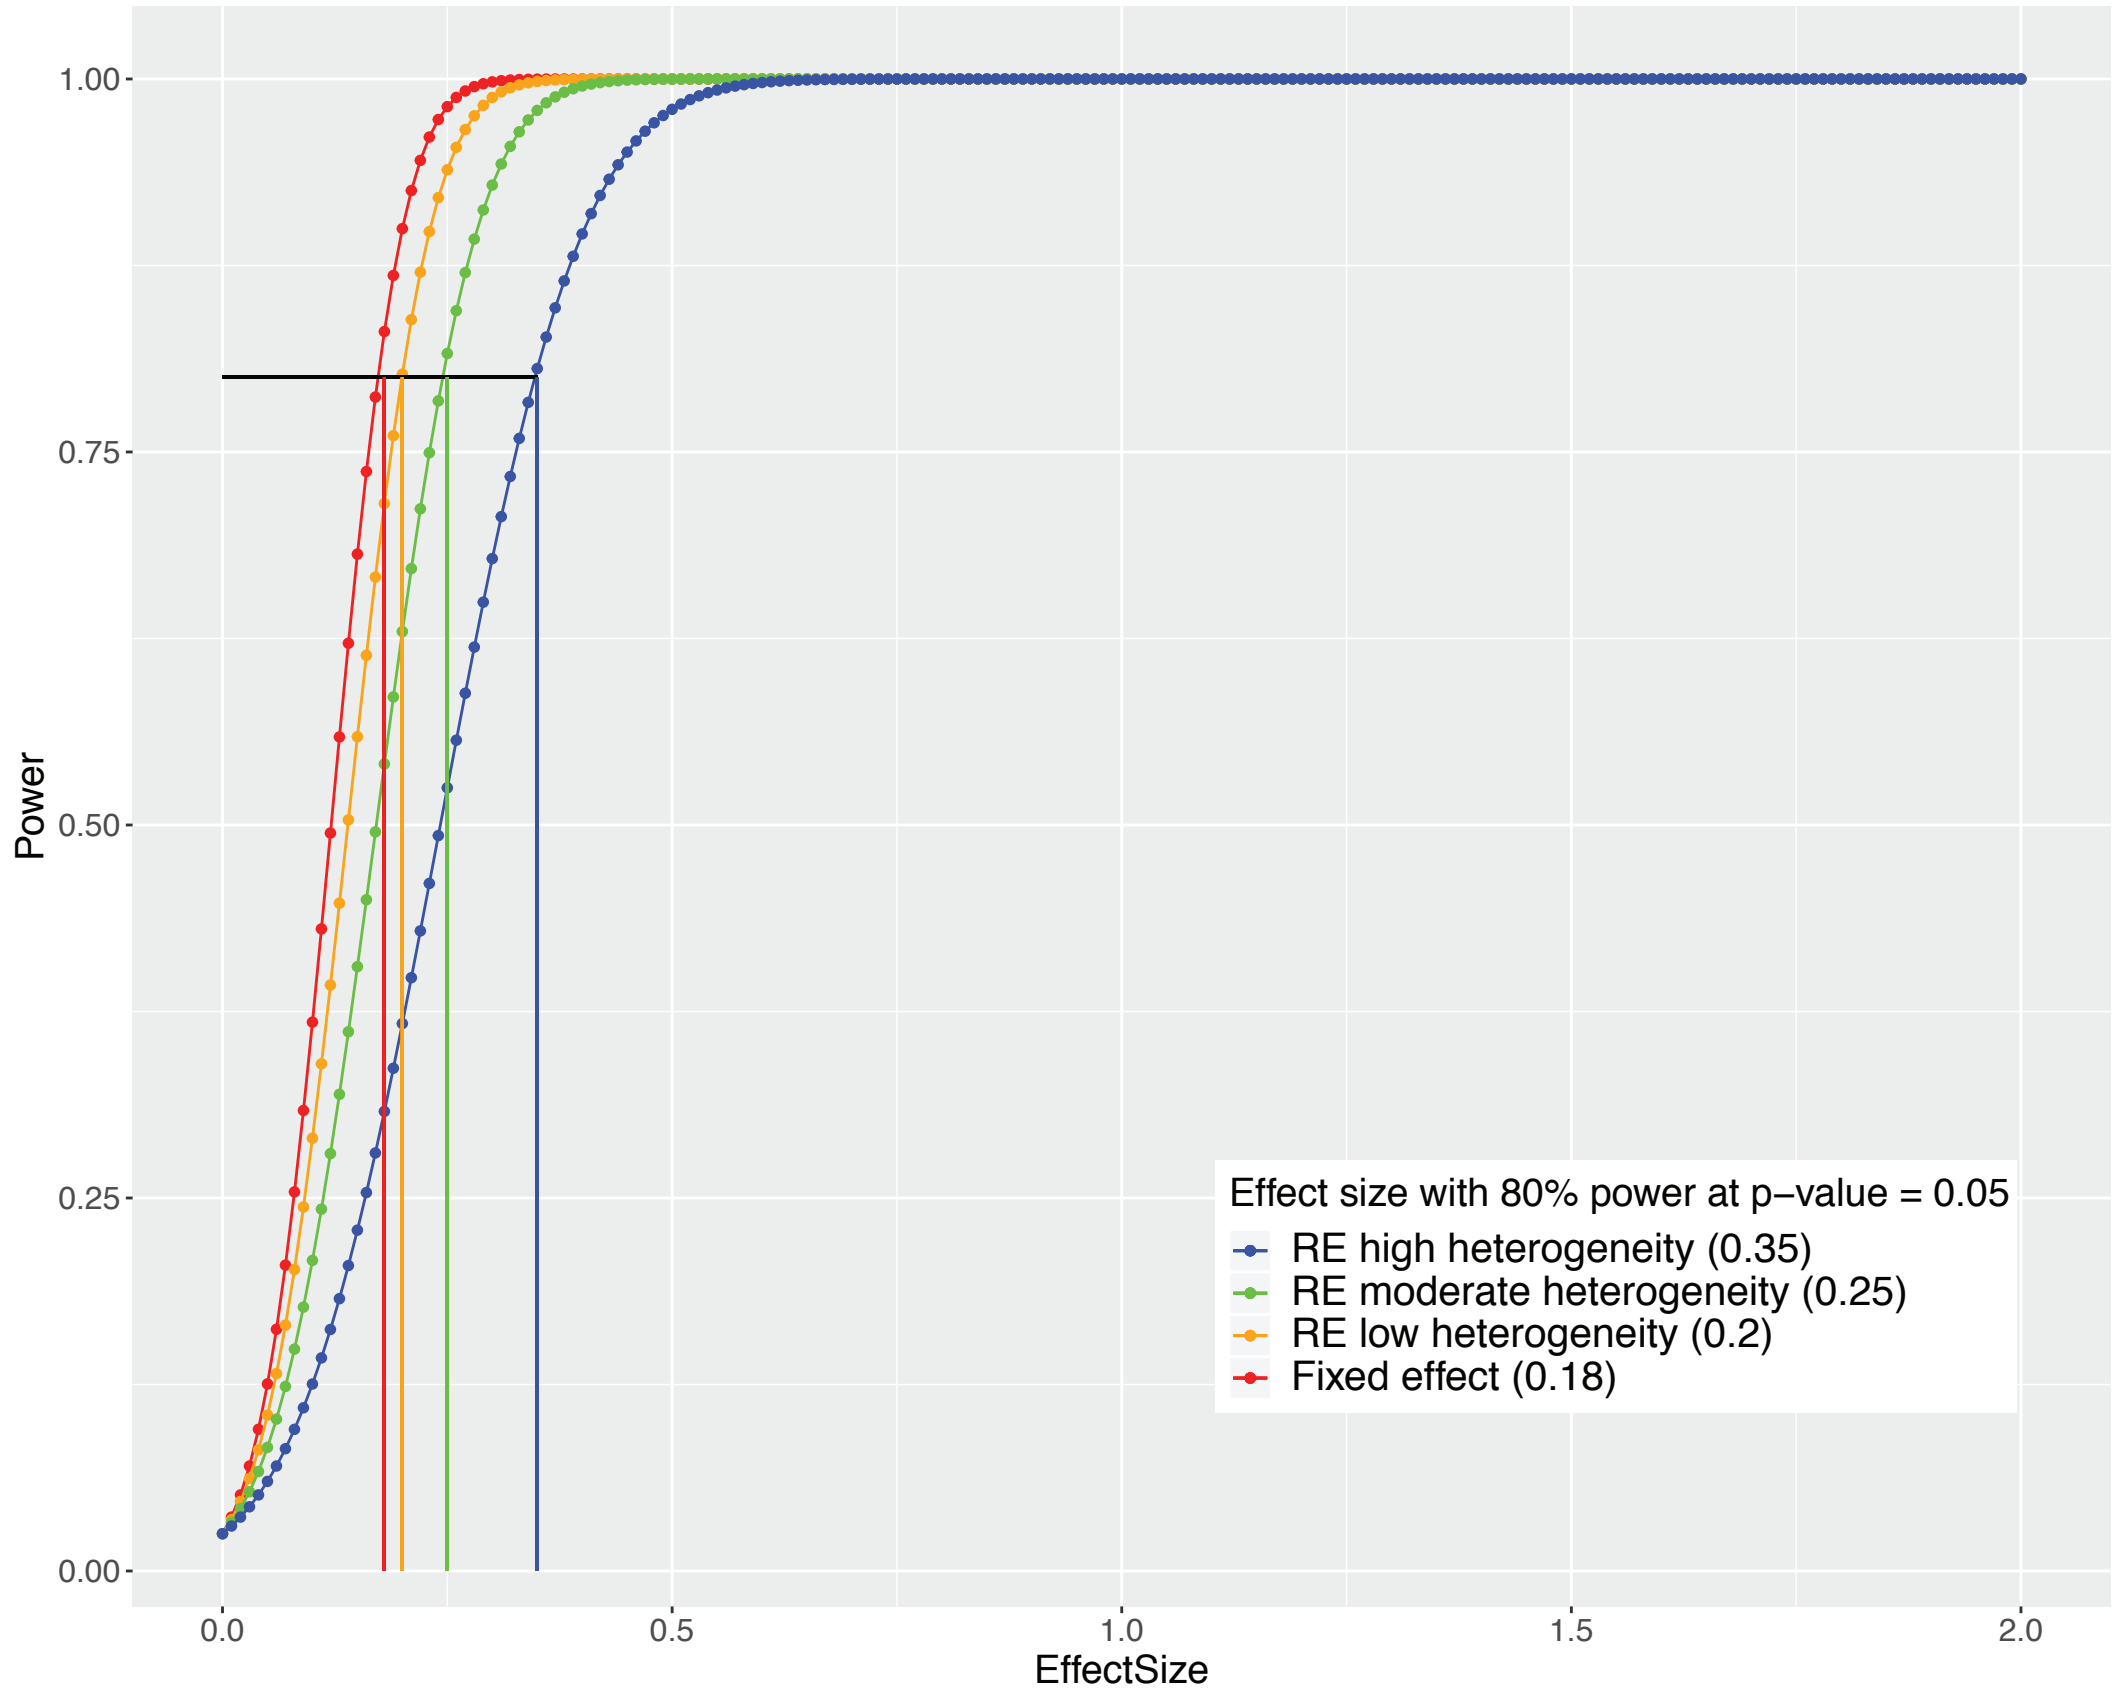

**Supplementary Figure 2.** Power Analysis. non-COVID-19 (n=652) versus healthy controls (n=672).

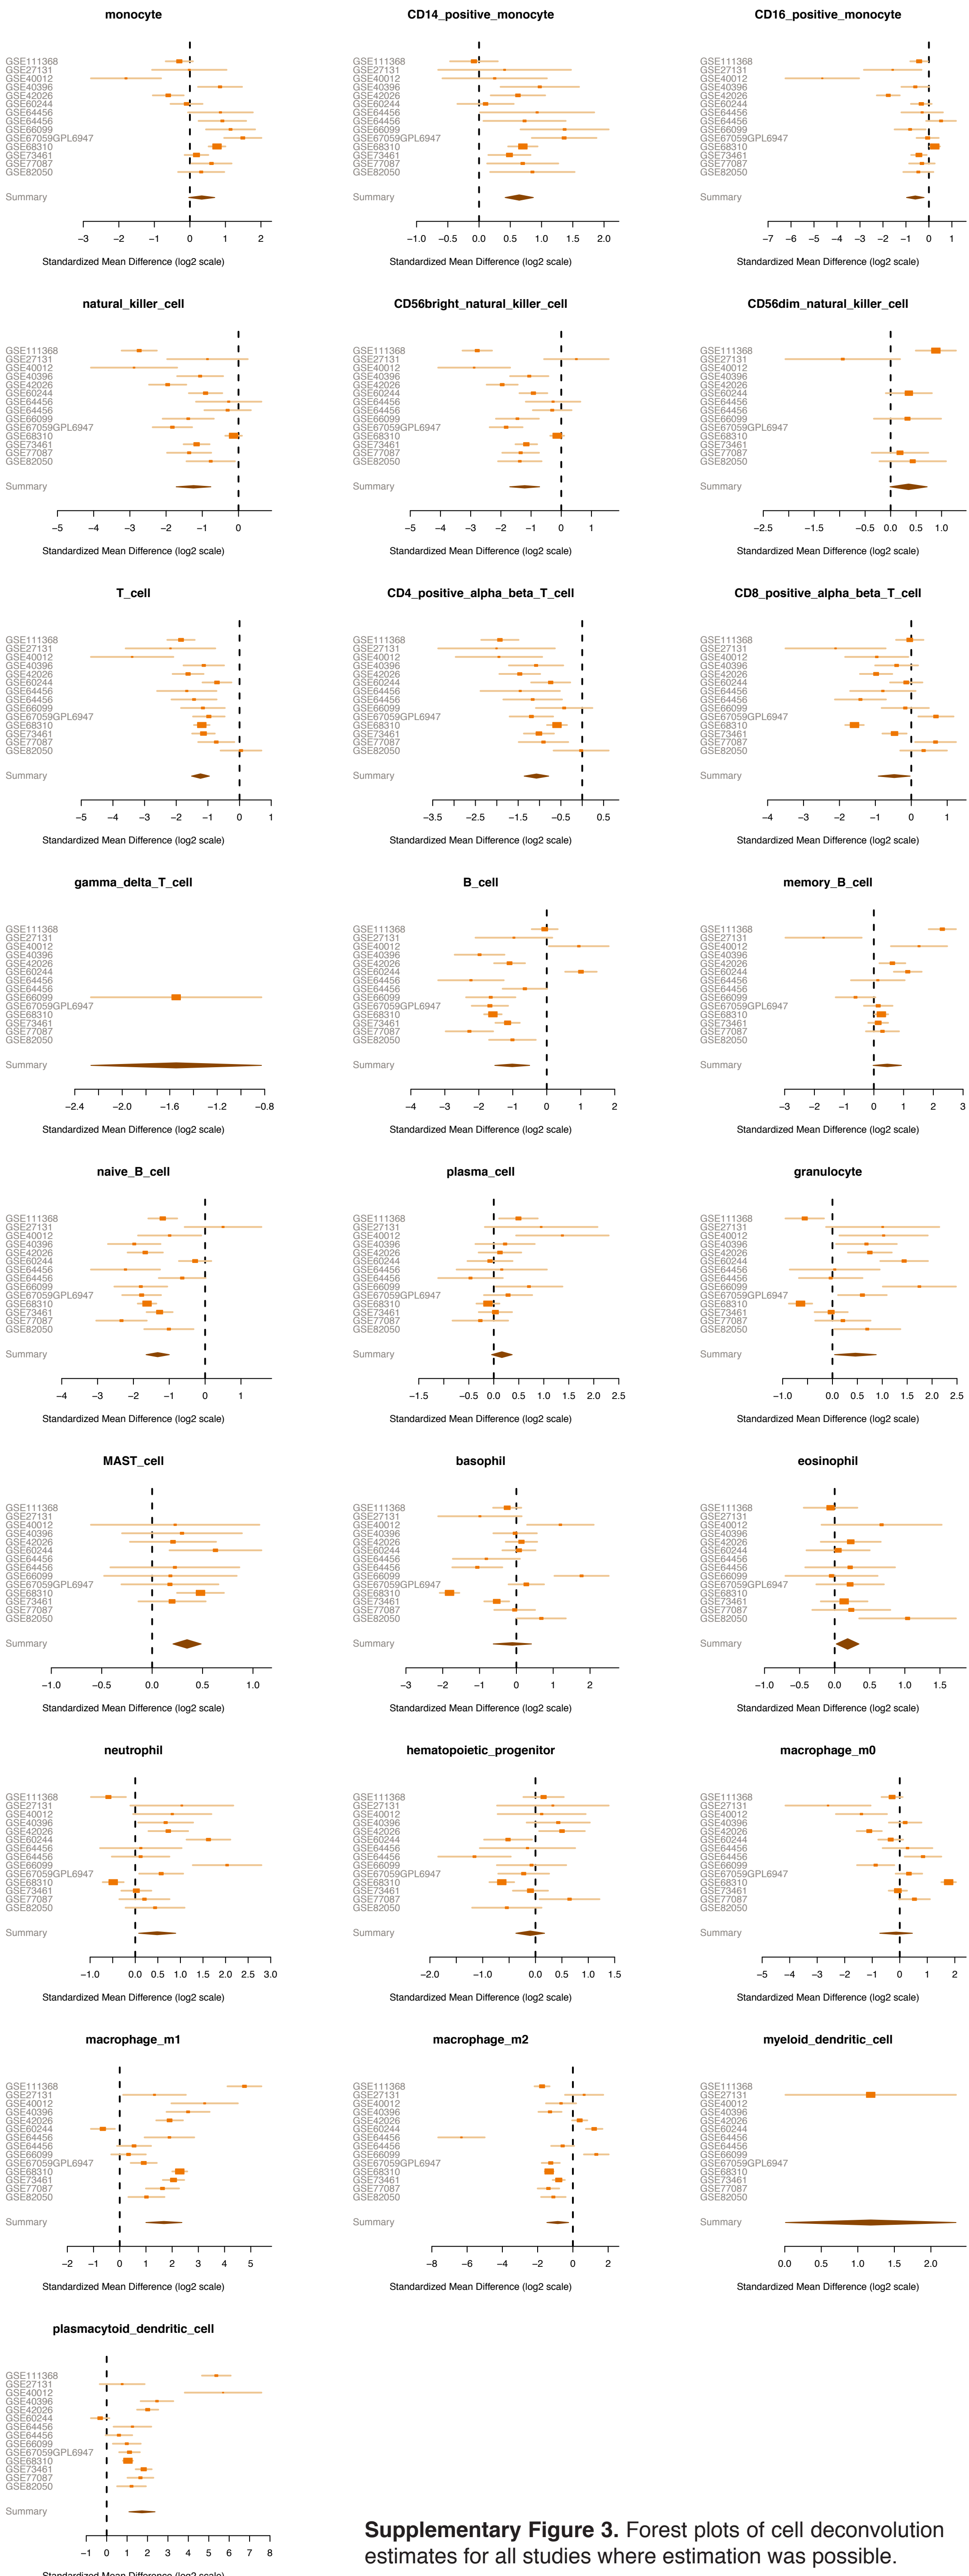

**Supplementary Figure 3.** Forest plots of cell deconvolution estimates for all studies where estimation was possible.

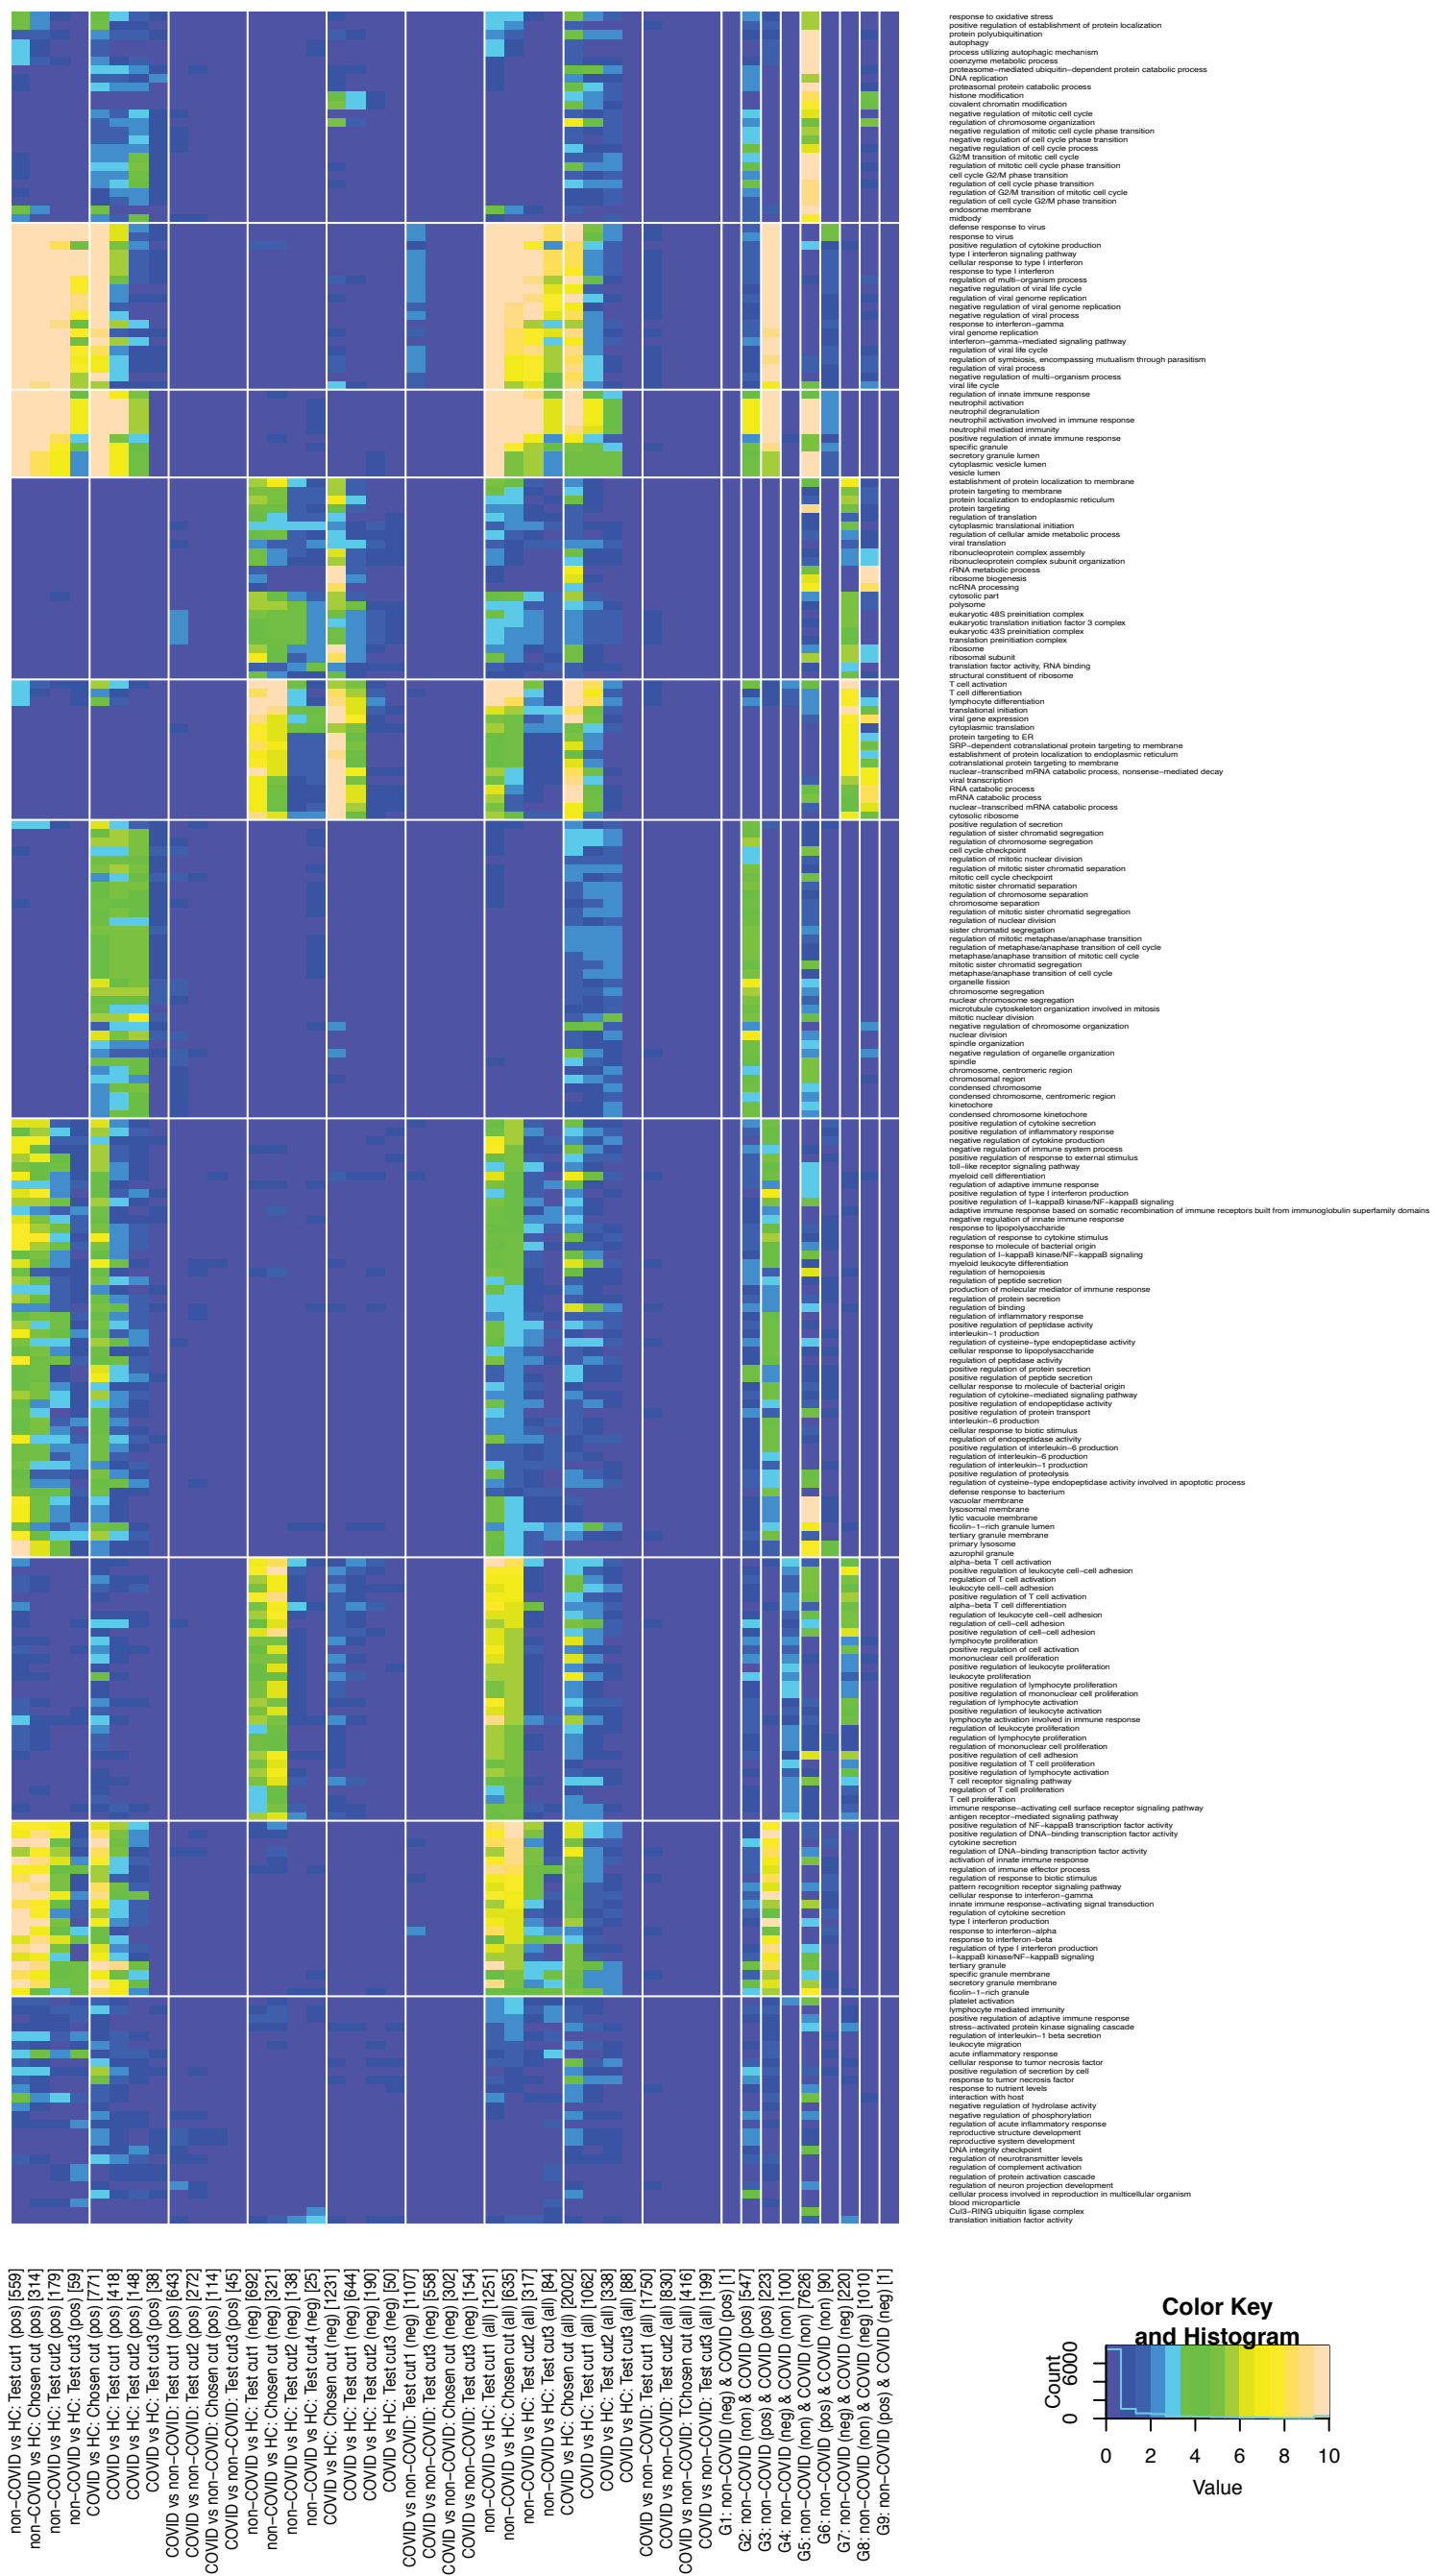

**Supplementary Figure 4.** Heatmap of significance score defined as  $-\log_{10}(P\text{-adjusted})$  from GO term enrichment analyses. Columns contain 45 gene sets including three gene sets (pos, neg, and all) each from COVID-19 vs HC, non-COVID-19 vs HC, or COVID-19 vs non-COVID-19 comparisons with the chosen cutoff and 3 more or less stringent cutoffs, together with 9 gene sets from Figure 4A (see Supplementary Table 4). Rows represent 252 GO terms filtered from a total 8422, in 10 groups by k-means.
